# Supplementary material for: Metabolic Threat to Vision: Hyperuricemia-Associated Retinal Ganglion Cell Damage Through Inflammatory and Apoptotic Pathways
Source: Research Square preprint supplement (doi:10.21203/rs.3.rs-8301375/v1), 2025-12-22
Supplement: Supplementary file 1 [file 89124183dafd3b19fe1ceccd.docx]

**Supplementary Files**


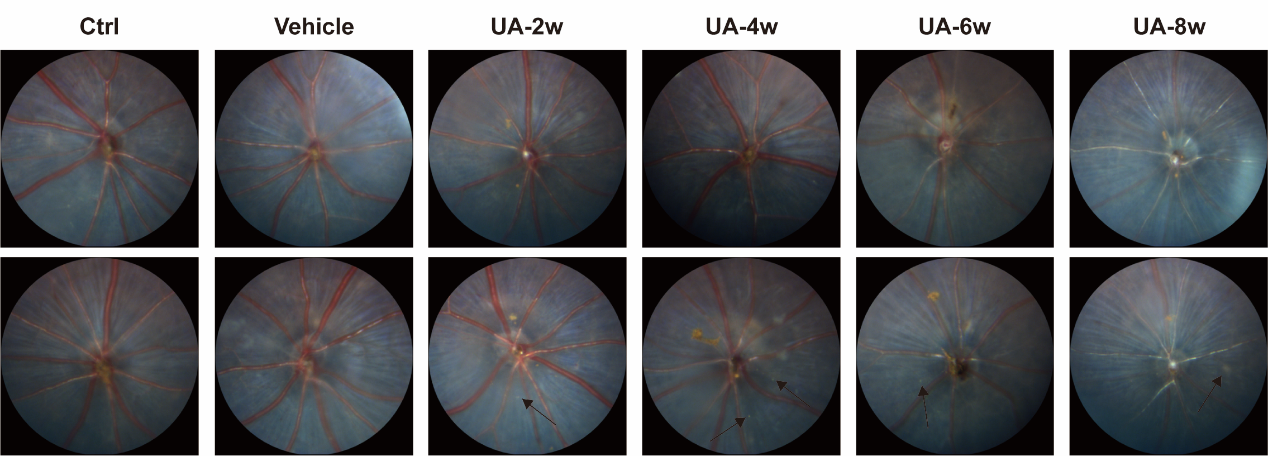


**Supplementary Fig. 1 HUA leads to morphological changes of retinal blood vessels.** Representative fundus photography of the mice. Black arrow: suspicious UA crystals deposition in the vitreous body and retina.


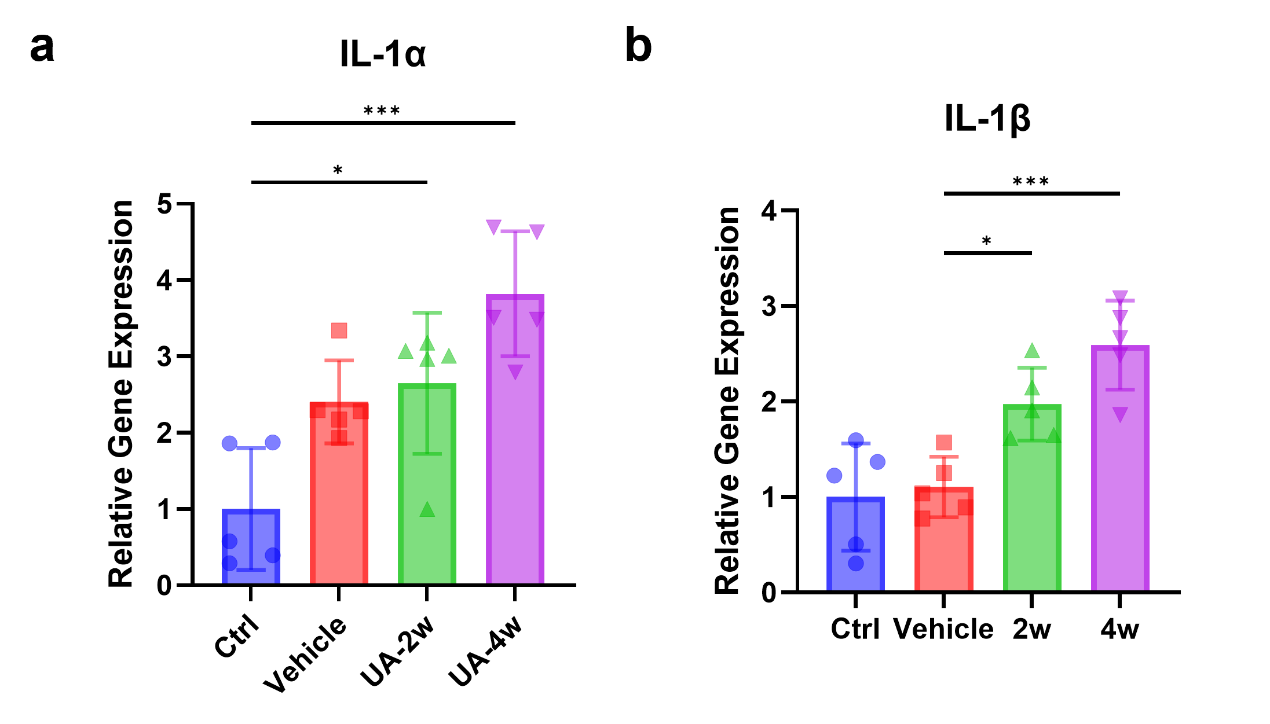


**Supplementary Fig. 2 HUA promotes retinal inflammation.** The gene expression levels of IL-1α (a), IL-1β (b) in retinas of modeling mice (n=5). Data are presented as mean ± SD; *p < 0.05; **p < 0.01, ***p < 0.0001 (one-way analysis of variance followed by Tukey’s post hoc tests).


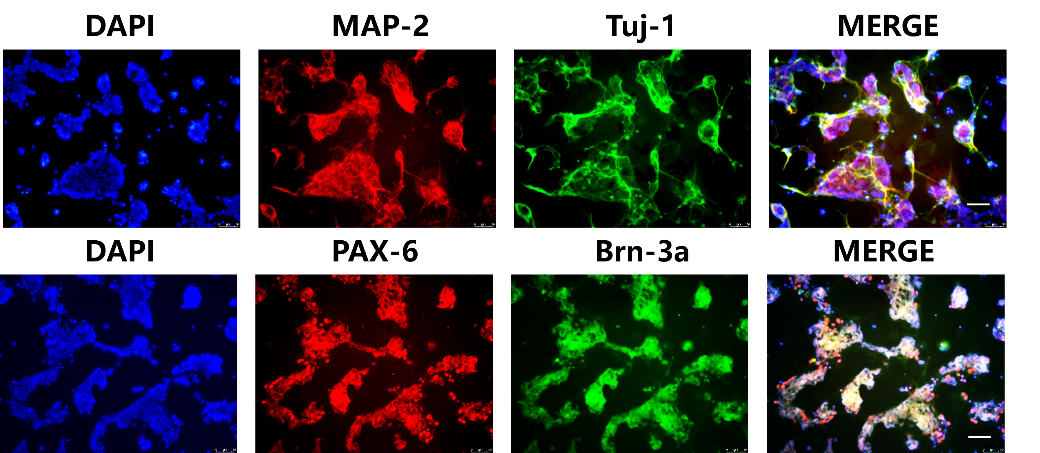


**Supplementary Fig. 3 PRNs labeled with specific markers for neurons and RGCs.** Representative co-staining images of MAP-2 and Tuj-1, PAX-6 and Brn-3a on the PRNs. Scale bar: 25 µm.


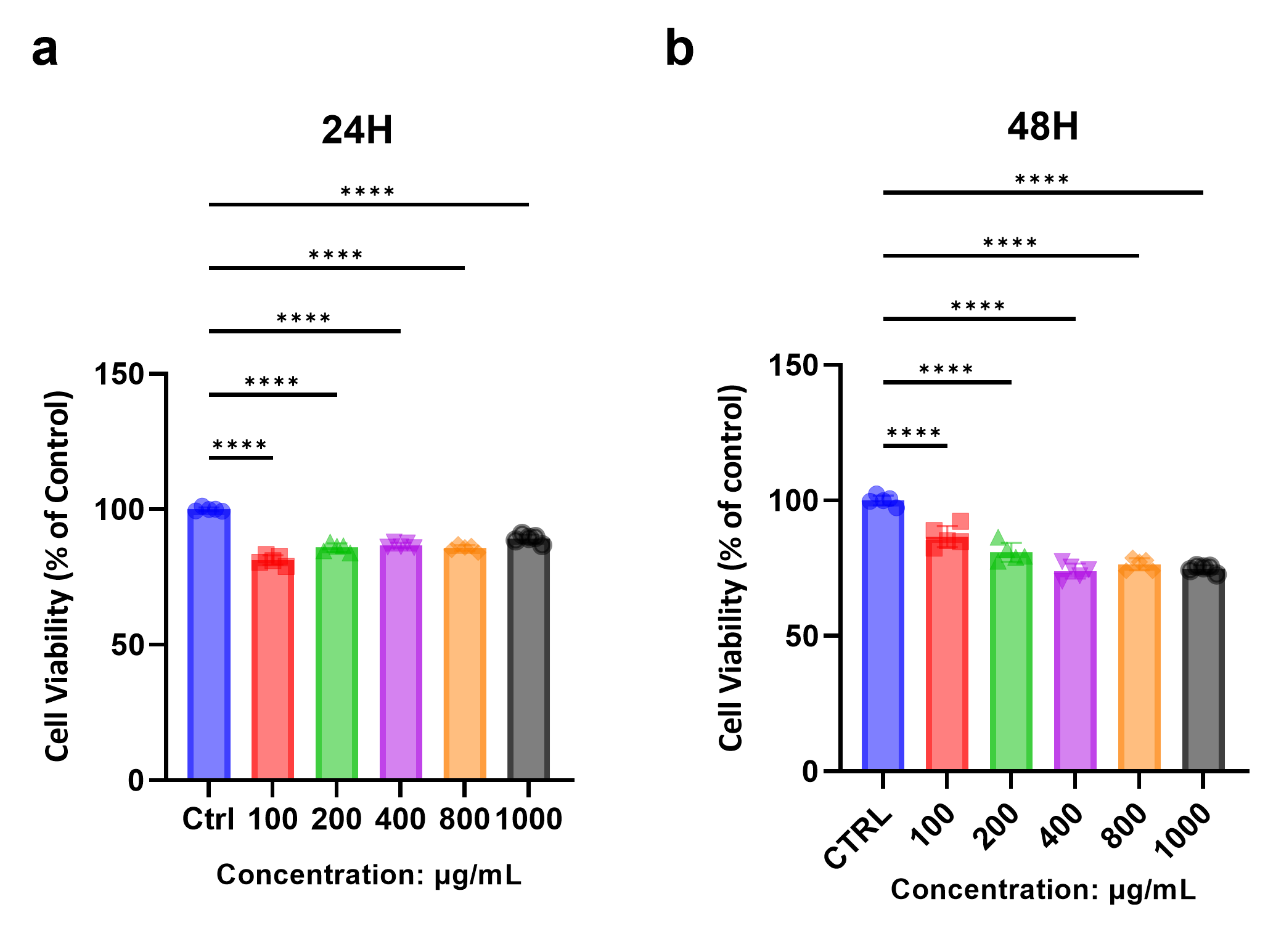


**Supplementary Fig. 4 UA reduces the viability of R28 cells.** The cell viability of R28 cells with treatment of different UA concentrations for 24 (a) and 48 (b) hours (n=5). Data are presented as mean ± SD; ****p < 0.0001 (one-way analysis of variance followed by Tukey’s post hoc tests).


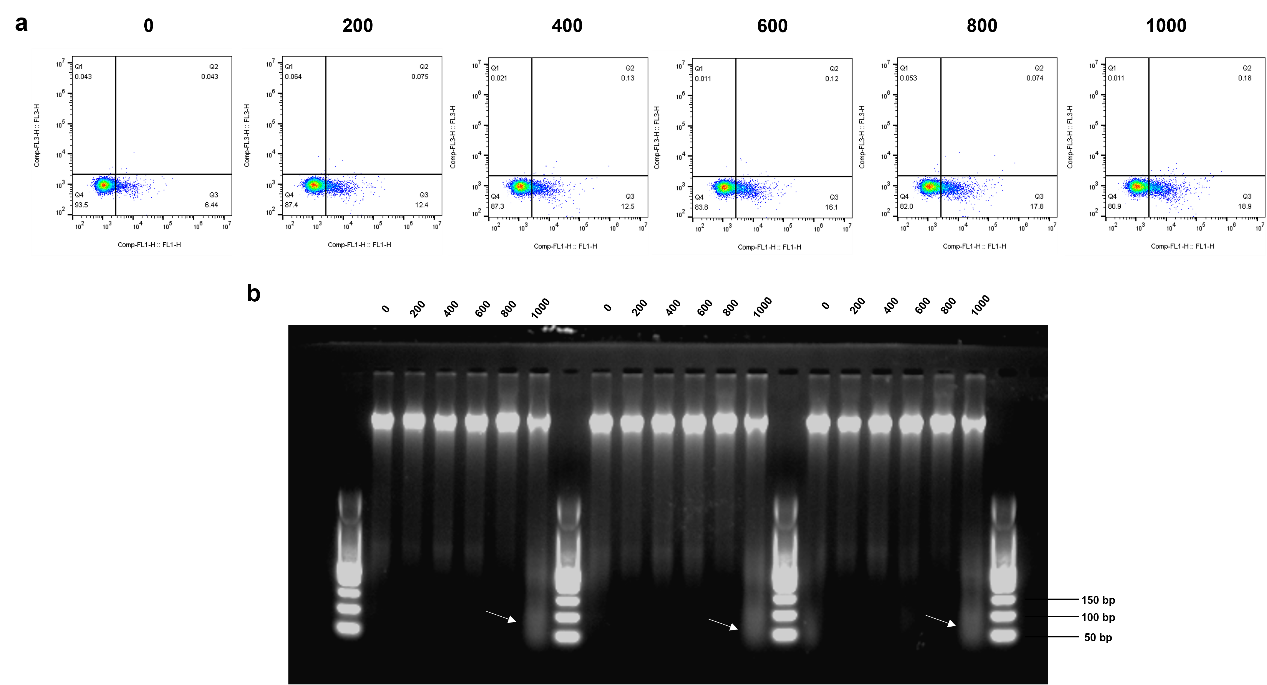


**Supplementary Fig. 5 UA increases the early apoptosis. (a) Representative flow cytometry images of PRNs with treatment of different UA concentrations for 12 hours (apoptosis rate from 0 to 1000 µmol/L: 6.44, 12.4, 12.5, 16.1, 17.8 and 18.9%). (b) Representative DNA ladder images of R28 cells with treatment of different UA concentrations for 24 hours.**
